# Supplementary material for: High throughput screening of norbornadiene/quadricyclane derivates for molecular solar thermal energy storage
Source: Royal Society of Chemistry journal article supplement (doi:10.1039/d2cp03032b), 2022-01-01
Supplement: d2cp03032b1.pdf [file d2cp03032b1.pdf]

# Supporting Information: High Throughput Screening of Norbornadiene/Quadricyclane Derivates for Molecular Solar Thermal Energy Storage

Jacob Lynge Elholm,<sup>†</sup> Andreas Erbs Hillers-Bendtsen,<sup>†</sup> Helen Hölzel,<sup>‡</sup> Kasper  
Moth-Poulsen,<sup>‡,¶,§</sup> and Kurt V. Mikkelsen<sup>\*,†</sup>

<sup>†</sup>*Department of Chemistry, University of Copenhagen, Universitetsparken 5, 2100  
Copenhagen Ø, Denmark*

<sup>‡</sup>*Department of Chemistry and Chemical Engineering, Chalmers University of Technology,  
Gothenburg 412 96, Sweden*

<sup>¶</sup>*The Institute of Materials Science of Barcelona, ICMAB-CSIC, 08193, Bellaterra,  
Barcelona, Spain*

<sup>§</sup>*Catalan Institution for Research and Advanced Studies, ICREA, Pg. Lluís Companys 23,  
Barcelona, Spain*

E-mail: kmi@chem.ku.dk

## SI 1.1

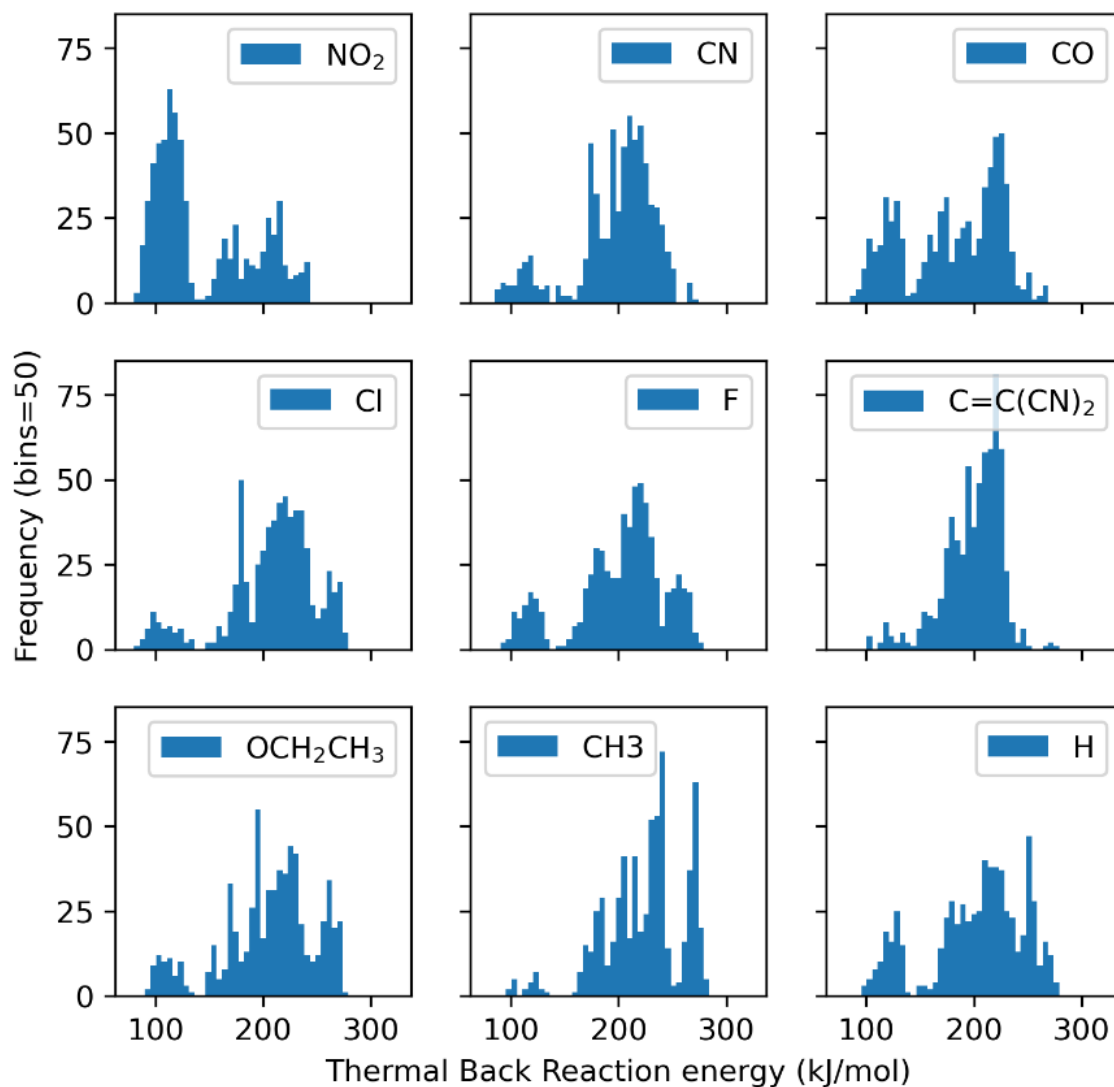

Figure 1: In each plot is a histogram of the structures with at least one of the specified substituents on the ortho-position on the phenyl ring coupled to the NBD core structure. We see a tendency, that if the substituent  $\text{NO}_2$  is on the ortho position, then TBR energy is generally lower. This can be due to the overestimation of the product energy or underestimation of the transition state energy. This was not investigated further.
